# Supplementary material for: Experimental and DFT studies on the ultrasonic energy-assisted extraction of the phytochemicals of Catharanthus roseus as green corrosion inhibitors for mild steel in NaCl medium
Source: Royal Society of Chemistry journal article supplement (doi:10.1039/c9ra08971c), 2020-01-01

## DFT and studies on the ultrasonic energy-assisted extraction of the phytochemicals of *Catharanthus roseus* as green corrosion inhibitors for mild steel in NaCl medium

N. Palaniappan<sup>a\*</sup>, I. Cole<sup>\*b</sup>, F. Caballero-Briones<sup>c</sup>, S. Manickam<sup>d</sup>, Justin Thomas<sup>e</sup> and D. Santos<sup>f</sup>

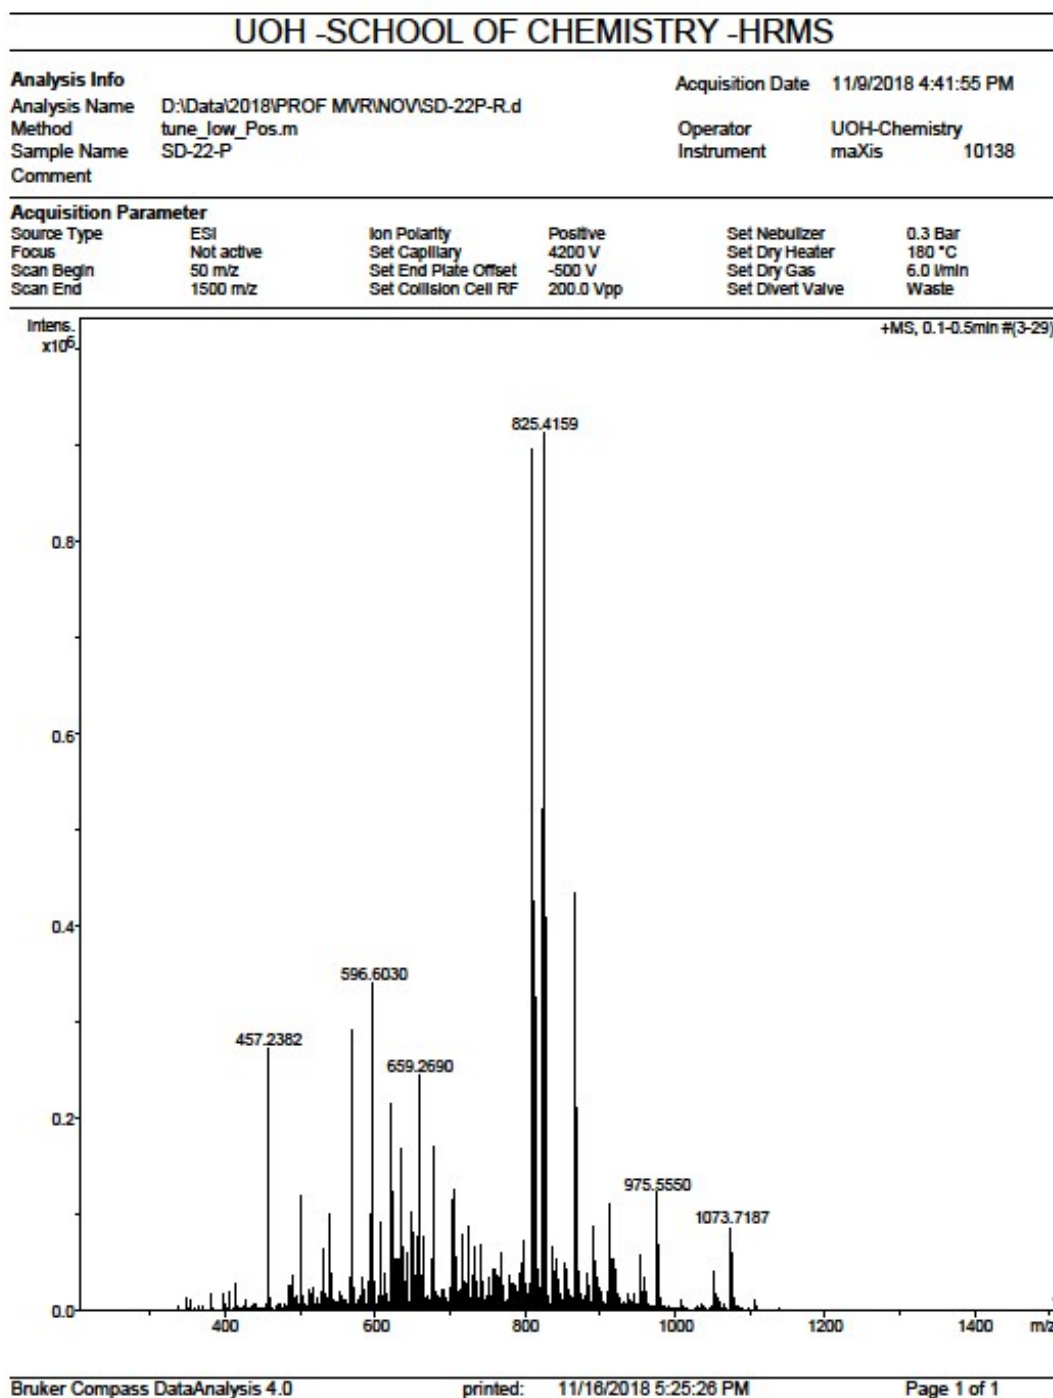

# UOH -SCHOOL OF CHEMISTRY -HRMS

## Analysis Info

Analysis Name D:\Data\2018\PROF MVR\NOV\SD-22P-R.d  
Method tune\_low\_Pos.m  
Sample Name SD-22-P  
Comment

Acquisition Date 11/9/2018 4:41:55 PM

Operator UOH-Chemistry  
Instrument maXis 10138

## Acquisition Parameter

|             |            |                       |           |                  |           |
|-------------|------------|-----------------------|-----------|------------------|-----------|
| Source Type | ESI        | Ion Polarity          | Positive  | Set Nebulizer    | 0.3 Bar   |
| Focus       | Not active | Set Capillary         | 4200 V    | Set Dry Heater   | 180 °C    |
| Scan Begin  | 50 m/z     | Set End Plate Offset  | -500 V    | Set Dry Gas      | 6.0 l/min |
| Scan End    | 1500 m/z   | Set Collision Cell RF | 200.0 Vpp | Set Divert Valve | Waste     |

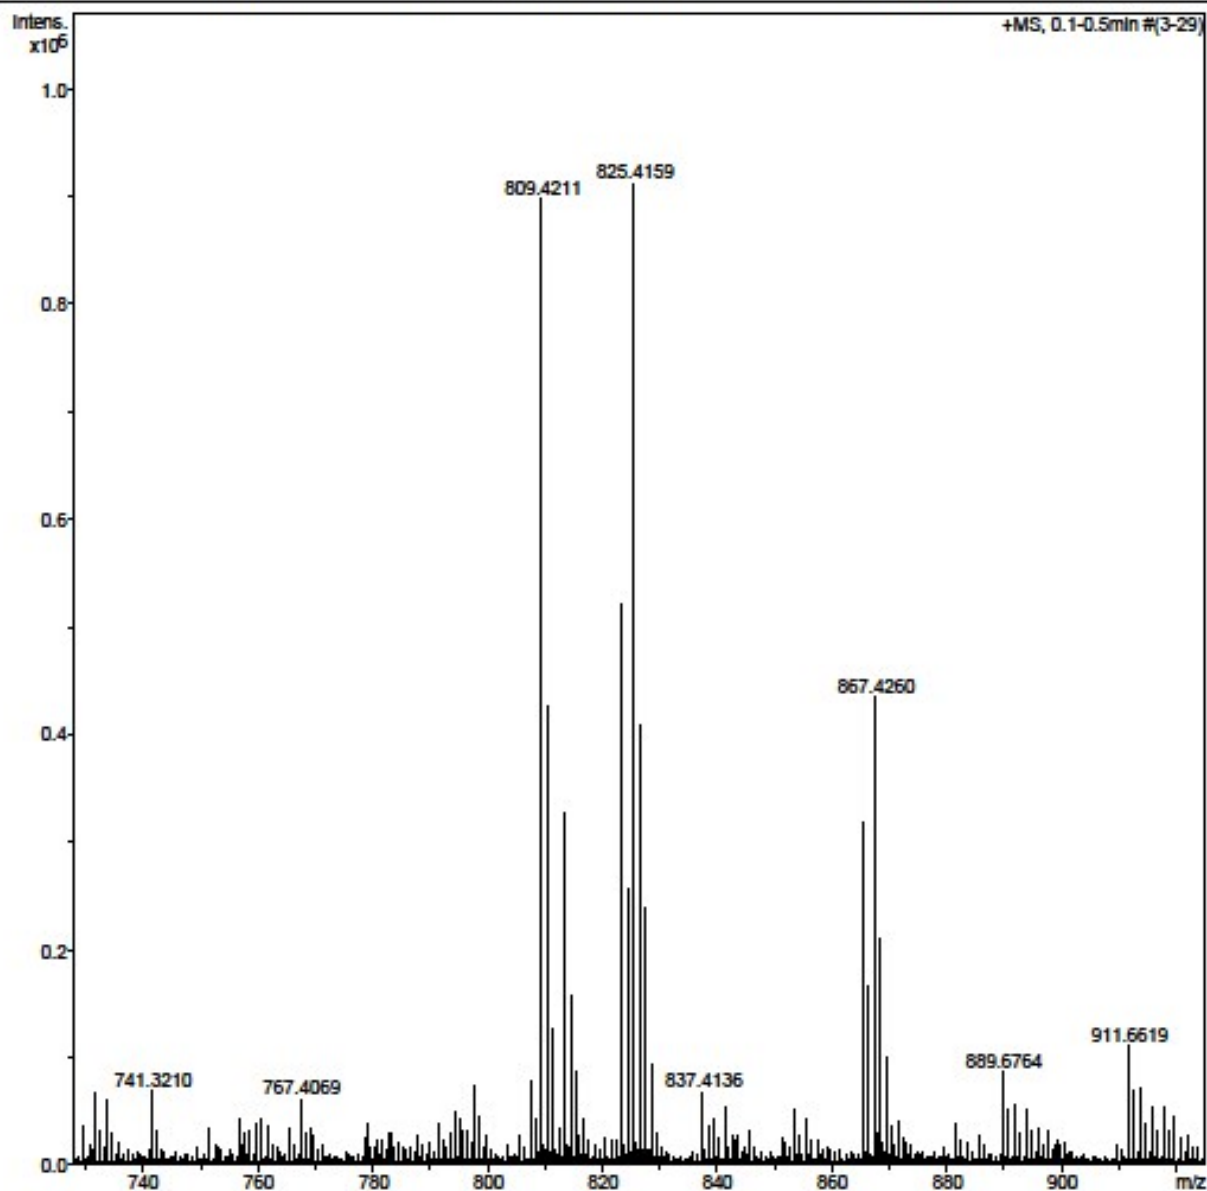

Supplement: c9ra08971c1.pdf [file c9ra08971c1.pdf]
